# Supplementary material for: Patient-Derived Explants of Colorectal Cancer: Histopathological and Molecular Analysis of Long-Term Cultures
Source: MDPI journal article supplement (doi:10.3390/cancers13184695), 2021-09-19
Supplement: s1 [file s1]

# Patient-Derived Explants of Colorectal Cancer: Histopathological and Molecular Analysis of Long-Term Cultures

Sara da Mata<sup>1,2,†</sup> & Teresa Franchi-Mendes<sup>3,4,†</sup>, Sofia Abreu<sup>3,4</sup>, Bruno Filipe<sup>5</sup>, Sónia Morgado<sup>1</sup>, Marta Mesquita<sup>1</sup>, Vítor E. Santo<sup>3,4</sup>, Cristina Albuquerque<sup>5</sup>, Ricardo Fonseca<sup>1,6</sup>, Erwin Boghaert<sup>7</sup>, Isadora Rosa<sup>8,\*</sup>, Catarina Brito<sup>3,4,9,\*</sup>

<sup>1</sup> Serviço de Anatomia Patológica, Instituto Português de Oncologia de Lisboa Francisco Gentil (IPOLFG, EPE), R. Prof. Lima Basto, 1099-023 Lisboa, Portugal. smata@ipolisboa.min-saude.pt (S.d.M.); smorgado@ipolisboa.min-saude.pt (S.M.); mmesquita@ipolisboa.min-saude.pt (M.M.); rifonseca@ipolisboa.min-saude.pt (R.F.)

<sup>2</sup> NOVA Medical School, NMS, Universidade Nova de Lisboa, Campo dos Mártires da Pátria 130, 1169-056 Lisboa, Portugal

<sup>3</sup> IBET Instituto de Biologia Experimental e Tecnológica, Apartado 12, 2780-901 Oeiras, Portugal. mtmendes@ibet.pt (T.F.M.); sofia\_abreu5@hotmail.com (S.A.); vitorespanto@gmail.com (V.E.S.); anabrito@ibet.pt (C.B.)

<sup>4</sup> Instituto de Tecnologia Química e Biológica António Xavier, Universidade Nova de Lisboa, Av. da República, 2780-157 Oeiras, Portugal

<sup>5</sup> Unidade de Investigação em Patobiologia Molecular (UIPM), Instituto Português de Oncologia de Lisboa Francisco Gentil (IPOLFG, EPE), R. Prof. Lima Basto, 1099-023 Lisboa, Portugal. bfil-ipe@ipolisboa.min-saude.pt (B.F.); calbuque@ipolisboa.min-saude.pt (C.A.)

<sup>6</sup> FMUL, Faculdade de Medicina da Universidade de Lisboa, Av. Prof. Egas Moniz MB, 1649-028 Lisboa, Portugal

<sup>7</sup> Abbvie, 1 North Waukegan Road, North Chicago, IL 60064-6098, United States of America; er-win.boghaert@abbvie.com

<sup>8</sup> Serviço de Gastrenterologia, Instituto Português de Oncologia de Lisboa Francisco Gentil (IPOLFG, EPE), R. Prof. Lima Basto, 1099-023 Lisboa, Portugal. isarosa@ipolisboa.min-saude.pt (I.R.)

<sup>9</sup> The Discoveries Centre for Regenerative and Precision Medicine, Lisbon Campus, Av. da República, 2780-157 Oeiras Portugal

† Sara da Mata and Teresa F Mendes equally contributed to this work.

\* Correspondence: I.R.: isarosa@ipolisboa.min-saude.pt; C.B.: anabrito@ibet.pt

Figure S1

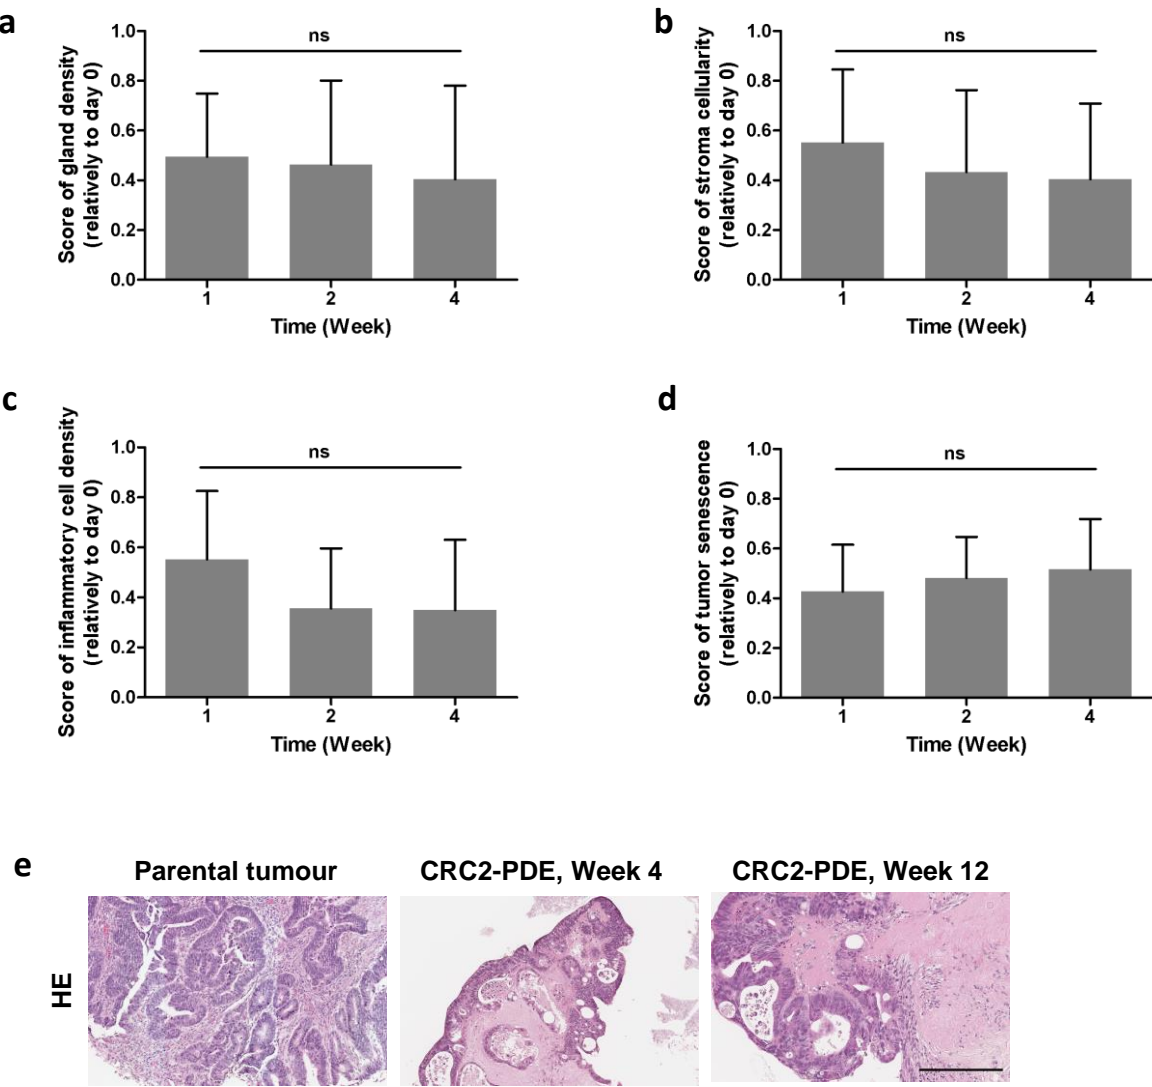

**Supplementary Figure S1: Morphological characterization of CRC-PDE.** Scores of (a) gland density, (b) stroma cellularity, (c) inflammatory cells and (d) tumour cell senescence were evaluated along 4 weeks of culture from 21 biological replicates. Data are presented as mean  $\pm$  SD (score for each case is described in Figure 2e and Table S1). Data were analysed by one-way Friedman's test. Week 1: days 7-9; Week 2: days 14-17; Week 4: days 25-28. (e) Representative images of morphological characterization by HE of the parental tumour (CRC2) and derived explants (CRC2-PDE), at weeks 4 and 12 of culture. Tumour cells formed glands and located preferentially in the periphery. Tumoral necrosis was focally present. Scale bar 200  $\mu$ m. CRC-PDE, Colorectal cancer patient-derived explants; HE, hematoxylin and eosin. ns, non-significant.

Figure S2

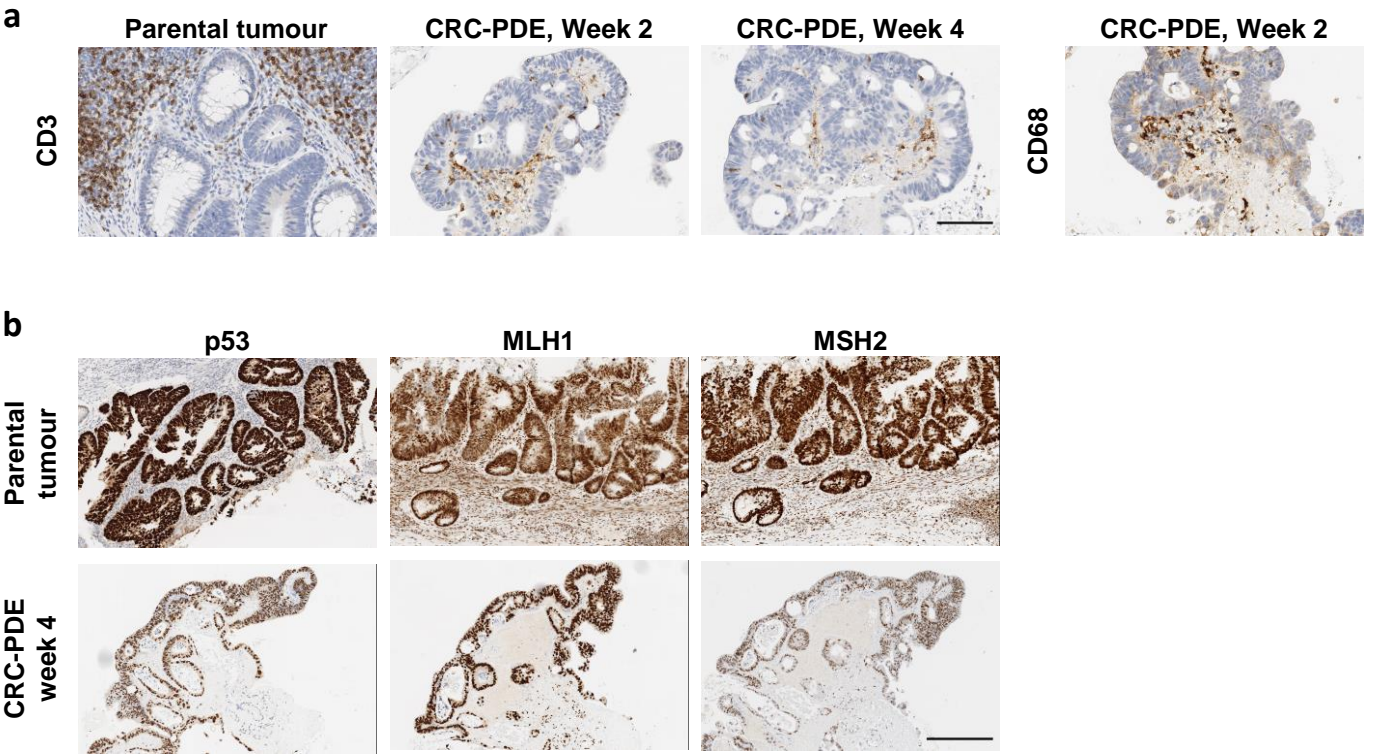

**Supplementary Figure S2: Immunohistochemical characterization of CRC-PDE.** (a) Representative images of detection of T lymphocytes (CD3-positive) and macrophages (CD68-positive) on the parental tumour tissue (CRC2) and derived explants (CRC2-PDE), at weeks 2 and 4 of culture. Scale bar 100  $\mu$ m. (b) Representative images of detection of proteins associated with carcinogenesis pathways in the parental tumour (CRC2) and derived explants (CRC2-PDE), at week 4 of culture. Scale bar 300  $\mu$ m. *CRC-PDE*, Colorectal cancer patient-derived explants; *MLH1*, human mutL homolog 1; *MSH2*, human mutS homolog 2.

Figure S3

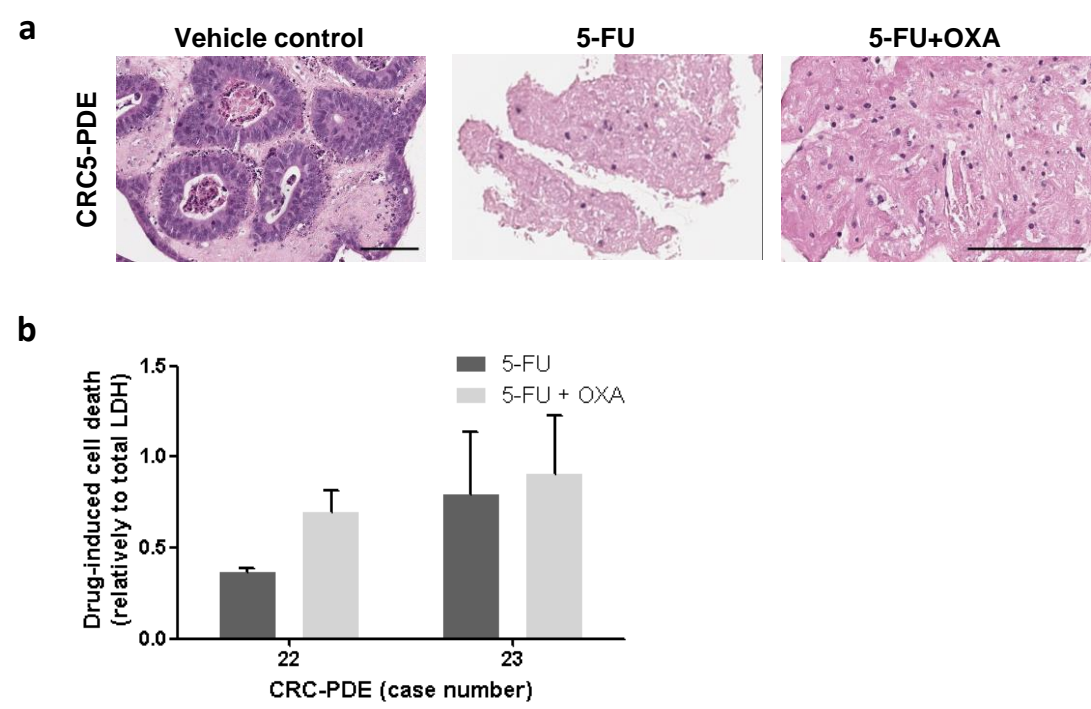

**Supplementary Figure S3: Drug challenge in CRC-PDE cultures.** (a) Representative HE images of CRC5-PDE, vehicle control and challenge with 5-FU or 5-FU+OXA, at week 3 of culture. After two weeks of drug exposure, control CRC5-PDE had viable tumour while samples treated with 5-FU and 5-FU+OXA showed tumour necrosis and only the latter showed viable stroma. Scale bar 100  $\mu$ m. **B**, LDH leakage assay of CRC22-PDE and CRC23-PDE exposed to 5-FU and to 5-FU + OXA for 2 weeks relatively to total LDH content. CRC-PDE, Colorectal cancer patient-derived explant culture; 5-FU, 5-Fluorouracil; HE, Hematoxylin and eosin; OXA, Oxaliplatin.

**Figure S4**

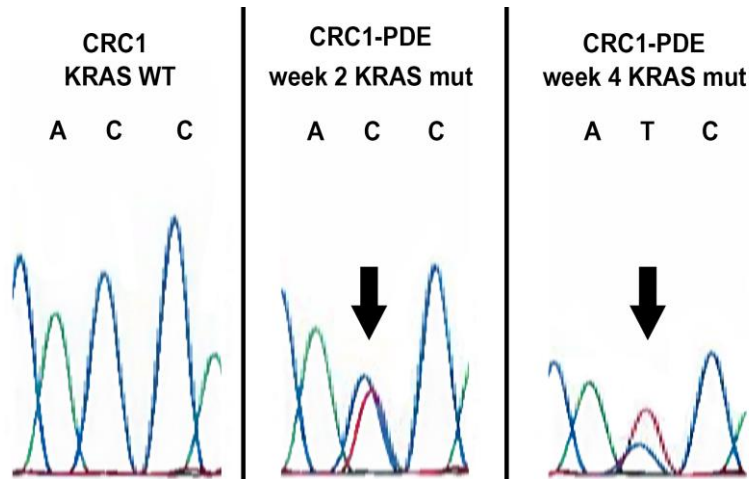

**Supplementary Figure S4.** CRC1 and CRC1-PDE DNA sequence of *KRAS* exon 2 codon 12. The electropherogram shows the reverse sequence. Arrows indicate *KRAS* mutation. *KRAS* mutated clone enrichment was observed at week 4. *CRC*, Colorectal cancer, *CRC-PDE*; Colorectal cancer patient-derived explants; *WT*, wild type; *mut* mutated.

Table S1. Scores of histopathological characterization of 21 CRC-PDE relative to day 0.

|       |                    | Time (Day) |     |     |     |     |       |       |                           |  | Time (Day) |     |     |     |     |       |       |
|-------|--------------------|------------|-----|-----|-----|-----|-------|-------|---------------------------|--|------------|-----|-----|-----|-----|-------|-------|
|       |                    | 0          | 1   | 4   | 7-9 | 11  | 14-17 | 25-28 |                           |  | 0          | 1   | 4   | 7-9 | 11  | 14-17 | 25-28 |
| CRC1  | Gland density      | 1.0        | nd  | nd  | nd  | 1.0 | 0.0   | 0.0   | Senescent phenotype       |  | 0.0        | nd  | nd  | nd  | 0.3 | 0.3   | 0.3   |
| CRC2  |                    | 1.0        | nd  | nd  | 0.3 | nd  | 0.7   | 0.7   |                           |  | 0.0        | nd  | nd  | 0.0 | nd  | 0.3   | 0.3   |
| CRC3  |                    | 1.0        | nd  | nd  | 0.0 | nd  | 0.0   | 0.0   |                           |  | 0.0        | nd  | nd  | nd  | nd  | nd    | nd    |
| CRC4  |                    | 1.0        | nd  | nd  | nd  | 0.7 | 0.7   | 1.0   |                           |  | 0.0        | nd  | nd  | nd  | 0.7 | 0.3   | 0.3   |
| CRC5  |                    | 1.0        | nd  | nd  | 0.3 | nd  | 0.3   | 0.0   |                           |  | 0.0        | nd  | nd  | 0.3 | nd  | 0.7   | 0.3   |
| CRC6  |                    | 1.0        | nd  | nd  | 0.7 | nd  | 0.3   | 0.3   |                           |  | 0.0        | nd  | nd  | 0.3 | nd  | 0.3   | 0.3   |
| CRC7  |                    | 1.0        | nd  | nd  | 0.3 | nd  | 0.7   | 0.7   |                           |  | 0.0        | nd  | nd  | 0.3 | nd  | 0.7   | 1.0   |
| CRC8  |                    | 1.0        | nd  | nd  | 0.7 | nd  | 0.7   | 0.7   |                           |  | 0.0        | nd  | nd  | 0.3 | nd  | 0.3   | 0.3   |
| CRC9  |                    | 1.0        | nd  | nd  | 0.0 | nd  | 0.3   | 0.3   |                           |  | 0.0        | nd  | nd  | 0.3 | nd  | 0.7   | nd    |
| CRC10 |                    | 1.0        | nd  | nd  | 0.7 | nd  | 0.0   | 0.0   |                           |  | 0.0        | nd  | nd  | 0.3 | nd  | 0.7   | 0.7   |
| CRC11 |                    | 1.0        | nd  | nd  | 0.3 | nd  | 0.3   | 0.3   |                           |  | 0.0        | nd  | nd  | 0.3 | nd  | 0.7   | 0.7   |
| CRC12 |                    | 1.0        | nd  | nd  | 0.7 | nd  | 0.3   | 0.3   |                           |  | 0.0        | nd  | nd  | 0.7 | nd  | 0.7   | 0.7   |
| CRC13 |                    | 1.0        | nd  | nd  | 1.0 | nd  | 1.3   | 1.3   |                           |  | 0.0        | nd  | nd  | 0.7 | nd  | 0.3   | 0.3   |
| CRC14 |                    | 1.0        | 1.0 | 0.3 | 0.3 | nd  | nd    | nd    |                           |  | 0.0        | 0.3 | 0.7 | 0.3 | nd  | nd    | nd    |
| CRC15 |                    | 1.0        | 1.0 | 0.7 | 0.7 | nd  | nd    | 0.3   |                           |  | 0.0        | 0.3 | 0.7 | 0.7 | nd  | nd    | 0.7   |
| CRC16 |                    | 1.0        | 0.7 | 0.3 | 0.7 | nd  | nd    | nd    |                           |  | 0.0        | 0.3 | 0.7 | 0.7 | nd  | nd    | nd    |
| CRC17 |                    | 1.0        | nd  | nd  | nd  | nd  | nd    | 0.0   |                           |  | 0.0        | nd  | nd  | nd  | nd  | nd    | 0.3   |
| CRC18 |                    | 1.0        | nd  | 0.7 | 0.3 | nd  | nd    | 0.0   |                           |  | 0.0        | nd  | 0.3 | 0.7 | nd  | nd    | 0.7   |
| CRC19 |                    | 1.0        | nd  | 1.0 | 0.7 | nd  | 0.7   | 0.7   |                           |  | 0.0        | nd  | 0.3 | 0.3 | nd  | nd    | 0.7   |
| CRC20 |                    | 1.0        | nd  | 0.7 | 0.7 | nd  | nd    | 0.7   |                           |  | 0.0        | nd  | 0.3 | 0.7 | nd  | nd    | 0.7   |
| CRC21 |                    | 1.0        | nd  | 0.7 | 0.7 | nd  | 0.7   | nd    |                           |  | 0.0        | nd  | 0.3 | 0.3 | nd  | 0.3   | nd    |
| Mean  |                    | 1.0        | 0.9 | 0.6 | 0.5 | 0.8 | 0.5   | 0.4   |                           |  | 0.0        | 0.3 | 0.5 | 0.4 | 0.5 | 0.5   | 0.5   |
| SD    |                    | 0.0        | 0.2 | 0.2 | 0.3 | 0.2 | 0.3   | 0.4   |                           |  | 0.0        | 0.0 | 0.2 | 0.2 | 0.2 | 0.2   | 0.2   |
| CRC1  | Stroma cellularity | 1.0        | nd  | nd  | nd  | 1.0 | 1.0   | 0.0   | Inflammatory cell density |  | 1.0        | nd  | nd  | nd  | 0.7 | 0.0   | 0.0   |
| CRC2  |                    | 1.0        | nd  | nd  | 0.7 | nd  | 0.7   | 0.3   |                           |  | 1.0        | nd  | nd  | 0.3 | nd  | 0.3   | 0.3   |
| CRC3  |                    | 1.0        | nd  | nd  | 0.0 | nd  | 0.0   | 0.0   |                           |  | 1.0        | nd  | nd  | 0.3 | nd  | 0.3   | 0.0   |
| CRC4  |                    | 1.0        | nd  | nd  | nd  | 0.3 | nd    | 0.0   |                           |  | 1.0        | nd  | nd  | nd  | 0.3 | nd    | 0.0   |
| CRC5  |                    | 1.0        | nd  | nd  | 0.7 | nd  | 0.3   | 0.3   |                           |  | 1.0        | nd  | nd  | 0.7 | nd  | 0.3   | 0.0   |
| CRC6  |                    | 1.0        | nd  | nd  | 0.3 | nd  | 0.0   | 0.3   |                           |  | 1.0        | nd  | nd  | 0.3 | nd  | 0.3   | 0.3   |
| CRC7  |                    | 1.0        | nd  | nd  | 0.3 | nd  | 0.3   | 0.3   |                           |  | 1.0        | nd  | nd  | 0.7 | nd  | 0.3   | 0.3   |
| CRC8  |                    | 1.0        | nd  | nd  | 0.3 | nd  | 0.0   | 0.0   |                           |  | 1.0        | nd  | nd  | 0.3 | nd  | 0.0   | 0.3   |
| CRC9  |                    | 1.0        | nd  | nd  | 1.0 | nd  | 1.0   | 1.0   |                           |  | 1.0        | nd  | nd  | 1.0 | nd  | 0.0   | 1.0   |
| CRC10 |                    | 1.0        | nd  | nd  | 0.7 | nd  | 0.3   | 0.3   |                           |  | 1.0        | nd  | nd  | 0.7 | nd  | 0.7   | 0.7   |
| CRC11 |                    | 1.0        | nd  | nd  | 0.3 | nd  | 0.3   | 0.3   |                           |  | 1.0        | nd  | nd  | 0.7 | nd  | 0.7   | 0.7   |
| CRC12 |                    | 1.0        | nd  | nd  | 0.7 | nd  | 0.7   | 0.7   |                           |  | 1.0        | nd  | nd  | 1.0 | nd  | 0.7   | 0.7   |
| CRC13 |                    | 1.0        | nd  | nd  | 0.3 | nd  | 0.7   | 0.7   |                           |  | 1.0        | nd  | nd  | 1.0 | nd  | 0.7   | 0.3   |
| CRC14 |                    | 1.0        | 1.0 | 0.3 | 0.0 | nd  | nd    | nd    |                           |  | 1.0        | 0.3 | 1.0 | 0.3 | nd  | nd    | nd    |
| CRC15 |                    | 1.0        | 1.0 | 0.7 | 0.7 | nd  | nd    | 0.3   |                           |  | 1.0        | 0.7 | 0.3 | 0.3 | nd  | nd    | 0.0   |
| CRC16 |                    | 1.0        | 1.0 | 1.0 | 1.0 | nd  | nd    | nd    |                           |  | 1.0        | 0.7 | 0.7 | 0.3 | nd  | nd    | nd    |
| CRC17 |                    | 1.0        | nd  | nd  | nd  | nd  | nd    | 0.7   |                           |  | 1.0        | nd  | nd  | nd  | nd  | nd    | 0.3   |
| CRC18 |                    | 1.0        | nd  | 0.7 | 0.7 | nd  | nd    | 0.3   |                           |  | 1.0        | nd  | 1.0 | 0.3 | nd  | nd    | 0.3   |
| CRC19 |                    | 1.0        | nd  | 1.0 | 1.0 | nd  | nd    | 0.7   |                           |  | 1.0        | nd  | 1.0 | 1.0 | nd  | nd    | 0.7   |
| CRC20 |                    | 1.0        | nd  | 0.7 | 0.7 | nd  | nd    | 1.0   |                           |  | 1.0        | nd  | 0.7 | 0.3 | nd  | nd    | 0.3   |
| CRC21 |                    | 1.0        | nd  | 0.7 | 0.7 | nd  | 0.3   | nd    |                           |  | 1.0        | nd  | 0.3 | 0.3 | nd  | 0.3   | nd    |
| Mean  |                    | 1.0        | 1.0 | 0.7 | 0.6 | 0.7 | 0.4   | 0.4   |                           |  | 1.0        | 0.6 | 0.7 | 0.6 | 0.5 | 0.4   | 0.3   |
| SD    |                    | 0.0        | 0.0 | 0.2 | 0.3 | 0.3 | 0.3   | 0.3   |                           |  | 0.0        | 0.2 | 0.3 | 0.3 | 0.2 | 0.2   | 0.3   |

Day 0 was considered the reference. It was scored as 1 for gland density, stroma cellularity and inflammatory cell density and as 0 for senescence evaluations.  
CRC-PDE, Colorectal cancer patient-derived explants; *nd*, not determined; *SD*, Standard deviation.

**Table S2 Clinicopathological features of the 26 patients and respective tumours.**

| Case  | Sex | Age, y | Tumor location   | Tumor histological type*    | TNM       | Stage | KRAS exon 2         | BRAF V600E | MSI   | MMRp            | p53    | Chemo. | FU, in mo | Patient status |
|-------|-----|--------|------------------|-----------------------------|-----------|-------|---------------------|------------|-------|-----------------|--------|--------|-----------|----------------|
| CRC1  | M   | 79     | Rectum           | ADC NOS                     | pT3 N1b   | IIIB  | c.35G>A, p.Gly12Asp | WT         | MSS   | Retained        | WT/(+) | No     | 57        | Alive, CRC-F   |
| CRC2  | M   | 54     | Sigmoid          | ADC NOS                     | pT1 N0    | I     | WT                  | WT         | MSS   | Retained        | (+)    | No     | 33        | Dead, UC       |
| CRC3  | M   | 52     | Sigmoid          | ADC NOS                     | pT1 N0    | I     | WT                  | WT         | MSI-L | Retained        | WT     | No     | 51        | Alive, CRC-F   |
| CRC4  | M   | 66     | Sigmoid          | ADC NOS                     | pT3m N0   | IIA   | WT                  | WT         | MSS   | Retained        | (+)    | No     | 43        | Alive, CRC-F   |
| CRC5  | M   | 72     | Sigmoid          | ADC NOS                     | pT4a N0   | IIB   | WT                  | WT         | MSS   | Retained        | Null   | No     | 0         | Dead, PO       |
| CRC6  | F   | 74     | Sigmoid          | ADC NOS                     | pT3 N1a   | IIIB  | c.34G>T, p.Gly12Asp | WT         | MSS   | Retained        | Null   | Yes    | 11        | Alive, CRC-F   |
| CRC7  | M   | 68     | Sigmoid          | ADC NOS                     | pT3 N0    | IIA   | c.35G>T, p.Gly12Val | WT         | MSS   | Retained        | Null   | No     | 46        | Alive, CRC-F   |
| CRC8  | M   | 87     | Sigmoid          | ADC NOS                     | pT2 N0    | I     | c.35G>A, p.Gly12Asp | WT         | MSS   | Retained        | Null   | No     | 2         | Alive, CRC-F   |
| CRC9  | M   | 77     | Sigmoid          | ADC NOS                     | pT3 N0    | IIA   | WT                  | WT         | MSI-L | Retained        | (+)    | No     | 0         | Dead, PO       |
| CRC10 | F   | 64     | Ascending colon  | ADC NOS                     | pT3 N0    | IIA   | WT                  | Mutated    | MSS   | Retained        | WT     | No     | 36        | Alive, CRC-F   |
| CRC11 | F   | 51     | Ascending colon  | ADC with mucinous component | (m)pT3 N0 | IIA   | c.38G>A, p.Gly13Asp | WT         | MSI-H | PMS2 loss       | WT     | No     | 8         | Dead, OC       |
| CRC12 | M   | 63     | Sigmoid          | Mucinous ADC                | pT3 N0    | IIA   | c.34G>T, p.Gly12Cys | WT         | MSS   | Retained        | (+)    | No     | 45        | Alive, CRC-F   |
| CRC13 | M   | 65     | Ascending colon  | ADC NOS                     | pT2 N0    | I     | WT                  | WT         | MSS   | Retained        | Null   | No     | 8         | Dead, OC       |
| CRC14 | M   | 80     | Sigmoid          | ADC NOS                     | (m)pT3 N0 | IIA   | WT                  | WT         | MSS   | Retained        | Null   | No     | 0         | Dead, PO       |
| CRC15 | M   | 59     | Transverse colon | ADC NOS                     | pT4a N1b  | IIIB  | c.34G>A, p.Gly12Ser | WT         | MSS   | Retained        | Null   | Yes    | 39        | Alive, CRC     |
| CRC16 | F   | 78     | Ascending colon  | ADC with mucinous component | pT3 N1b   | IIIB  | c.38G>A, p.Gly13Asp | NA         | NA    | Retained        | (+)    | Yes    | 36        | Alive, CRC     |
| CRC17 | M   | 60     | Sigmoid          | Mucinous ADC                | pT4b N1c  | IIIC  | c.35G>T, p.Gly12Val | NA         | NA    | Retained        | Null   | Yes    | 11        | Alive, CRC     |
| CRC18 | F   | 72     | Ascending colon  | ADC with mucinous component | pT2 N0    | I     | c.35G>T, p.Gly12Val | NA         | NA    | Retained        | WT     | No     | 23        | Alive, CRC-F   |
| CRC19 | M   | 72     | Sigmoid          | ADC NOS                     | pT2 N0    | I     | NA                  | NA         | NA    | Retained        | (+)    | No     | 31        | Alive, CRC-F   |
| CRC20 | M   | 60     | Sigmoid          | ADC NOS                     | pT4a N1b  | IIIB  | NA                  | NA         | NA    | Retained        | (+)    | Yes    | 4         | Dead, CRC      |
| CRC21 | F   | 75     | Sigmoid          | ADC NOS                     | pT3 N0    | IIA   | WT                  | NA         | NA    | Retained        | Null   | No     | 30        | Alive, CRC-F   |
| CRC22 | M   | 74     | Sigmoid          | ADC NOS                     | pT3 N0    | II    | NA                  | NA         | NA    | NA              | NA     | No     | 31        | Alive, CRC-F   |
| CRC23 | M   | 69     | Sigmoid          | ADC NOS                     | pT1 N0    | I     | NA                  | NA         | NA    | NA              | NA     | No     | 5         | Dead, OC       |
| CRC24 | M   | 68     | Sigmoid          | ADC NOS                     | pT3 N0    | II    | NA                  | NA         | NA    | Retained        | NA     | No     | 13        | Dead, OC       |
| CRC25 | F   | 60     | Sigmoid          | ADC NOS                     | pT3 N1    | IIIB  | NA                  | NA         | NA    | Retained        | NA     | No     | 22        | Alive, CRC-F   |
| CRC26 | M   | 71     | Transverse colon | ADC with mucinous component | pT2 N0    | I     | NA                  | WT         | NA    | MLH1, PMS2 loss | NA     | No     | 20        | Alive, CRC-F   |

\*All tumours were low grade.

ADC, adenocarcinoma; Chemo, Chemotherapy; CRC, Colorectal cancer; CRC-F Colorectal cancer-disease free (as of last follow-up); FU, Follow-up; MSI, Microsatellite instability; MSS, Microsatellite stable, MSI-L, Microsatellite instability-low; MSI-H, Microsatellite instability-high; mo, months; NA Not applicable; NOS, Not otherwise specified; OC Other causes; PO Post-operative complications; WT wild type; Y years, (+) overexpressed.
